# Supplementary material
Source: Springer Nature journal article supplement (https://www.springermedizin.de/resource/supplementary/12936_2006_245_MOESM27_ESM.pdf/9547286)

**A**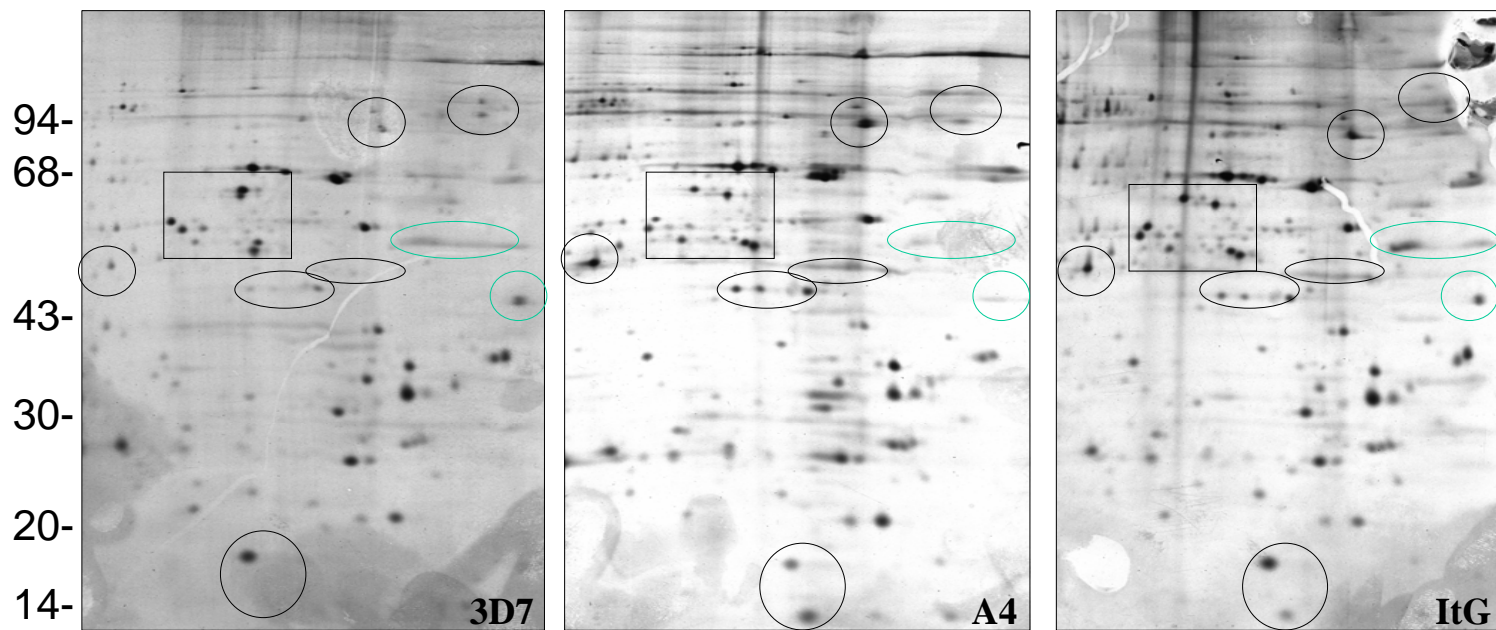**B**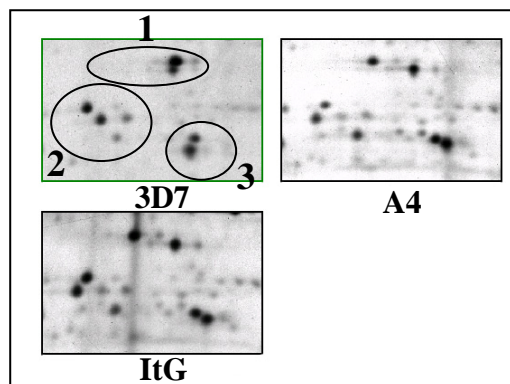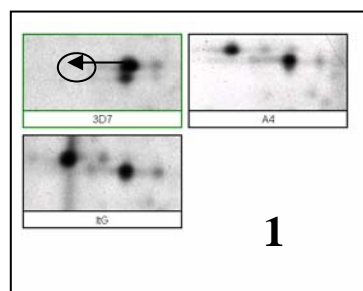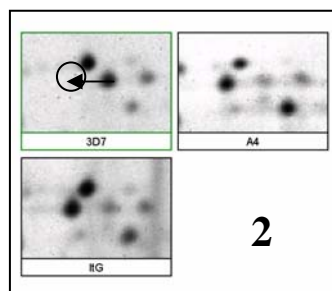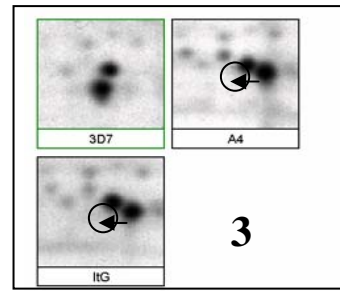

Supplement: MOESM27 [file 9547286]
